# Supplementary material
Source: publisher figshare collection journal article supplement (https://acs.figshare.com/ndownloader/files/5133691)
Supplement: Supplementary file 1 [file 5133691]

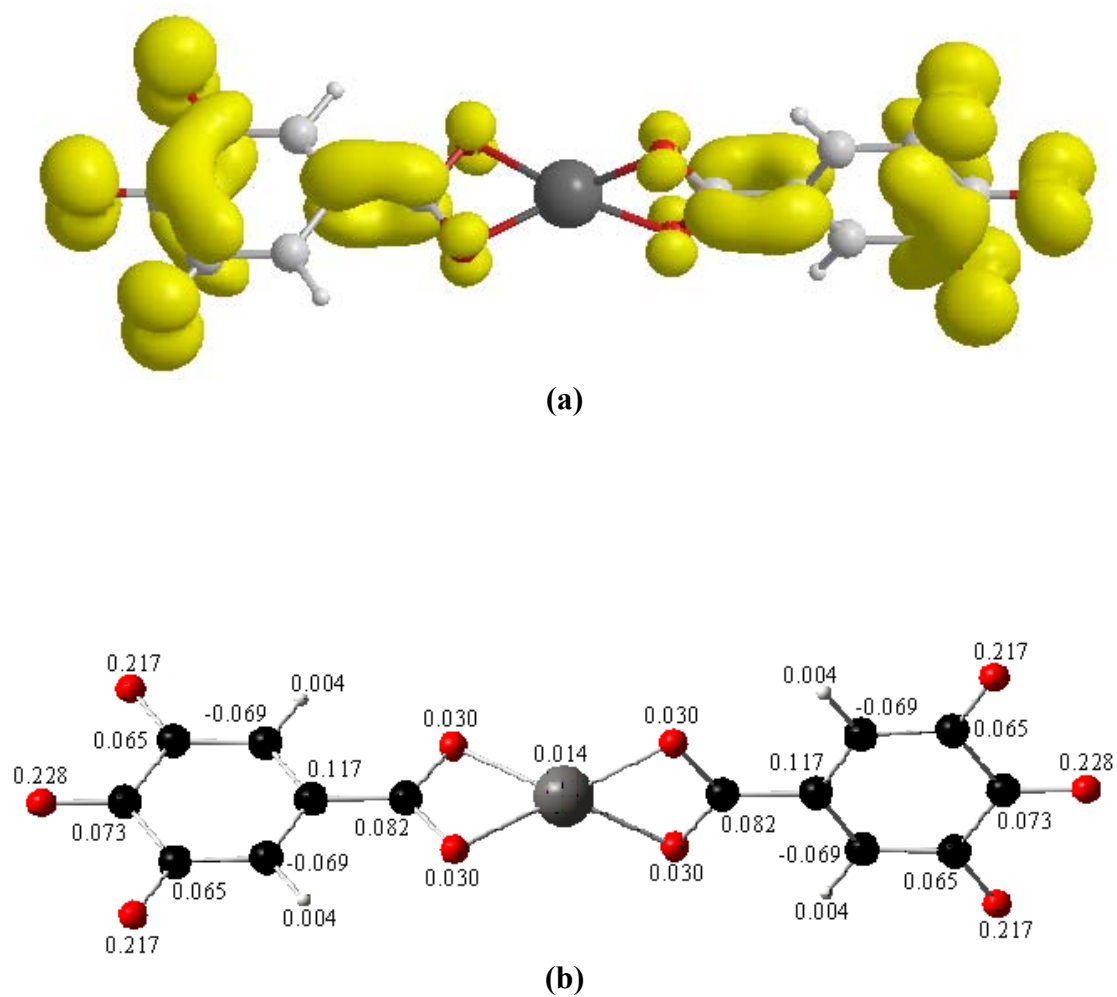

Figure S7 (a) DFT calculated spin density distribution for the Mg (GA)<sub>2</sub><sup>-</sup> complex. (b) Numerical values of spin densities on atoms.

*Giannakopoulos et al. Supplementary Information*  
**Figure S7**
